# Supplementary material
Source: PubMed Central journal article supplement (PMC2734204)
Supplement: 081720v2_2.pdf [file 081720v2_2.pdf]

Appendix 2 (as supplied by the authors): Association among different fracture type and death, expressed as adjusted hazard ratios and 95% CI†

| Incident fractures                                                   | Combined‡                | Men§               | Women                     |
|----------------------------------------------------------------------|--------------------------|--------------------|---------------------------|
| Population size                                                      |                          | 2163               | 5530                      |
| Fracture type (#)                                                    |                          |                    |                           |
| No vertebral fracture                                                | 1                        | 1                  | 1                         |
| Vertebral fracture 1 <sup>st</sup> year follow-up                    | 2.62 (0.95, 7.25)        | 0.97 (0.12, 7.83)  | <b>3.71 (1.14, 12.08)</b> |
| Vertebral fracture 2 <sup>nd</sup> year follow-up                    | <b>2.71 (1.12, 6.57)</b> | NA                 | <b>3.17 (1.24, 8.12)</b>  |
| Vertebral fracture 3 <sup>rd</sup> year follow-up                    | 0.59 (0.14, 2.47)        | NA                 | 0.47 (0.11, 2.00)         |
| Vertebral fracture 4 <sup>th</sup> or 5 <sup>th</sup> year follow-up | NA                       | NA                 | NA                        |
| No pelvic fracture                                                   | 1                        | NA                 | 1                         |
| Pelvic fracture 1 <sup>st</sup> year follow-up                       | 1.25 (0.17, 9.14)        | NA                 | 1.83 (0.24, 13.81)        |
| Pelvic fracture 2 <sup>nd</sup> year follow-up                       | 2.06 (0.27, 15.60)       | NA                 | 2.51 (0.32, 19.73)        |
| Pelvic fracture 3 <sup>rd</sup> year follow-up                       | NA                       | NA                 | NA                        |
| Pelvic fracture 4 <sup>th</sup> or 5 <sup>th</sup> year follow-up    | NA                       | NA                 | NA                        |
| No forearm fracture                                                  | 1                        | 1                  | 1                         |
| Forearm fracture 1 <sup>st</sup> year follow-up                      | 0.56 (0.14, 2.26)        | NA                 | 0.90 (0.22, 3.65)         |
| Forearm fracture 2 <sup>nd</sup> year follow-up                      | 2.22 (0.98, 5.02)        | 2.53 (0.34, 18.9)  | 2.40 (0.97, 5.91)         |
| Forearm fracture 3 <sup>rd</sup> year follow-up                      | 0.98 (0.31, 3.07)        | 1.45 (0.18, 11.53) | 0.90 (0.22, 3.64)         |
| Forearm fracture 4 <sup>th</sup> or 5 <sup>th</sup> year follow-up   | 0.69 (0.25, 1.90)        | 1.25 (0.17, 9.18)  | 0.60 (0.18, 1.95)         |
| No rib fracture                                                      | 1                        | 1                  | 1                         |
| Rib fracture 1 <sup>st</sup> year follow-up                          | 1.75 (0.43, 3.22)        | 1.20 (0.14, 10.31) | 1.05 (0.32, 3.43)         |
| Rib fracture 2 <sup>nd</sup> year follow-up                          | 1.30 (0.54, 3.12)        | 0.77 (0.11, 5.72)  | 1.47 (0.53, 4.07)         |
| Rib fracture 3 <sup>rd</sup> year follow-up                          | 0.70 (0.09, 5.71)        | NA                 | 1.42 (0.17, 11.82)        |
| Rib fracture 4 <sup>th</sup> or 5 <sup>th</sup> year follow-up       | NA                       | NA                 | NA                        |
| No other fracture                                                    | 1                        | 1                  | 1                         |
| Other fracture 1 <sup>st</sup> year follow-up                        | 0.38 (0.12, 1.21)        | 0.29 (0.04, 2.10)  | 0.41 (0.10, 1.69)         |
| Other fracture 2 <sup>nd</sup> year follow-up                        | 1.54 (0.82, 2.91)        | 1.08 (0.36, 3.51)  | 1.51 (0.70, 3.28)         |
| Other fracture 3 <sup>rd</sup> year follow-up                        | 1.28 (0.52, 3.12)        | 2.83 (0.98, 8.21)  | 0.40 (0.06, 2.83)         |
| Other fracture 4 <sup>th</sup> or 5 <sup>th</sup> year follow-up     | <b>0.24 (0.06, 0.98)</b> | NA                 | 0.39 (0.10, 1.56)         |
| No hip fracture                                                      | 1                        | 1                  | 1                         |
| Hip fracture 1 <sup>st</sup> year follow-up                          | <b>3.17 (1.35, 7.42)</b> | 3.14 (0.67, 14.89) | <b>2.99 (1.03, 8.68)</b>  |
| Hip fracture 2 <sup>nd</sup> year follow-up                          | 1.05 (0.38, 2.89)        | NA                 | 1.09 (0.39, 3.03)         |
| Hip fracture 3 <sup>rd</sup> year follow-up                          | 1.89 (0.60, 6.00)        | NA                 | 1.87 (0.57, 6.11)         |
| Hip fracture 4 <sup>th</sup> or 5 <sup>th</sup> year follow-up       | 0.57 (0.23, 1.43)        | 0.24 (0.03, 2.21)  | 0.59 (0.21, 1.66)         |

† NA = not applicable due to the lack of fractures during this time period. Values that are bolded represent statistically significant results.

‡ Model for the combined group was adjusted for the following: sex, corticosteroid use (not taking, taking), age (years), height (analyzed for every 10 cm change), weight (kg), and educational status (no university, some university), Canadian Multicentre Osteoporosis Study centre (St. John's, Halifax, Quebec City, Kingston, Toronto, Hamilton, Saskatoon, Calgary, Vancouver), clinically recognized minimal trauma fractures at or after age 50 years (no, yes), number of diseases (0, 1, 2, 3, or 4+), number of surgeries (0, 1, 2+), calcium intake (analyzed for every 100 mg/day change in consumption) alcohol intake (analyzed for every 10 drinks/year), regular activity (no/yes), and current smoking status (no/yes), Medical Outcomes Trust 36-item Health Survey standardized physical component and mental component summary score (analyzed for every 10 point change in the score), and the sex by age interaction.

§ Model for men was adjusted for the following: corticosteroid use (not taking, taking), age (years), height (analyzed for every 10 cm change), weight (kg), educational status (no university, some university), Canadian Multicentre Osteoporosis Study centre (St. John's, Halifax, Quebec City, Kingston, Toronto, Hamilton, Saskatoon, Calgary, Vancouver), clinically recognized minimal trauma fractures at or after age 50 years (no, yes), number of diseases (0, 1, 2, 3, or 4+), number of surgeries (0, 1, 2+), vitamin D intake from supplements and drugs (analyzed for every 100 IU/day), caffeine intake (analyzed for every 100 mg/day change in consumption), regular activity (no/yes), and current smoking status (no/yes), and the Medical Outcomes Trust 36-item Health Survey standardized physical component and mental component summary score (analyzed for every 10 point change in the score).

|| Model for women was adjusted for the following: hormone replacement therapy (not taking, taking), age (years), weight (kg), educational status (no university, some university), Canadian Multicentre Osteoporosis Study centre (St. John's, Halifax, Quebec City, Kingston, Toronto, Hamilton, Saskatoon, Calgary, Vancouver), clinically recognized minimal trauma fractures at or after age 50 years (no, yes), number of diseases (0, 1, 2, 3, or 4+), number of surgeries (0, 1, 2+), calcium intake (analyzed for every 100 mg/day change in consumption), regular activity (no/yes), and current smoking status (no/yes), and the Medical Outcomes Trust 36-item Health Survey standardized physical component mental component summary score (analyzed for every 10 point change in the score).
