# Supplementary material
Source: PubMed Central journal article supplement (PMC2734204)
Supplement: 081720v2_3.pdf [file 081720v2_3.pdf]

Appendix 3 (as supplied by the authors): The best predictive model for time to death, expressed as adjusted hazard ratios and 95% CI†

|                                                                      | Combined                 | Men                       | Women                     |
|----------------------------------------------------------------------|--------------------------|---------------------------|---------------------------|
| Incident fractures                                                   |                          |                           |                           |
| No vertebral fracture                                                | 1                        | 1                         | 1                         |
| Vertebral fracture 1 <sup>st</sup> year follow-up                    | <b>3.00 (1.10, 8.17)</b> | Not included              | <b>3.60 (1.14, 11.30)</b> |
| Vertebral fracture 2 <sup>nd</sup> year follow-up                    | <b>2.78 (1.23, 6.31)</b> | Not included              | <b>3.15 (1.38, 7.22)</b>  |
| Vertebral fracture 3 <sup>rd</sup> year follow-up                    | 0.58 (0.14, 2.38)        | Not included              | 0.42 (0.10, 1.74)         |
| Vertebral fracture 4 <sup>th</sup> or 5 <sup>th</sup> year follow-up | NA                       | Not included              | NA                        |
| No hip fracture                                                      | 1                        | 1                         | 1                         |
| Hip fracture 1 <sup>st</sup> year follow-up                          | <b>3.52 (1.54, 8.03)</b> | Not included              | Not included              |
| Hip fracture 2 <sup>nd</sup> year follow-up                          | 1.16 (0.42, 3.22)        | Not included              | Not included              |
| Hip fracture 3 <sup>rd</sup> year follow-up                          | 1.83 (0.58, 5.75)        | Not included              | Not included              |
| Hip fracture 4 <sup>th</sup> or 5 <sup>th</sup> year follow-up       | 0.52 (0.21, 1.30)        | Not included              | Not included              |
| No other fracture                                                    | 1                        | 1                         | 1                         |
| Other fracture 1 <sup>st</sup> year follow-up                        | 0.40 (0.13, 1.24)        | Not included              | Not included              |
| Other fracture 2 <sup>nd</sup> year follow-up                        | 1.48 (0.79, 2.80)        | Not included              | Not included              |
| Other fracture 3 <sup>rd</sup> year follow-up                        | 1.20 (0.46, 2.72)        | Not included              | Not included              |
| Other fracture 4 <sup>th</sup> or 5 <sup>th</sup> year follow-up     | <b>0.13 (0.02, 0.90)</b> | Not included              | Not included              |
| Anthropometric/demographic                                           |                          |                           |                           |
| Age                                                                  | <b>0.90 (0.85, 0.95)</b> | <b>0.91 (0.82, 0.99)</b>  | <b>0.89 (0.83, 0.96)</b>  |
| Education (some university)                                          | <b>0.65 (0.51, 0.82)</b> | Not included              | <b>0.51 (0.36, 0.74)</b>  |
| Sex (women)                                                          | <b>0.46 (0.39, 0.55)</b> | -                         | -                         |
| CaMos Centre                                                         |                          |                           |                           |
| Vancouver                                                            | 1                        | 1                         | 1                         |
| Calgary                                                              | Not included             | 0.58 (0.32, 1.07)         | Not included              |
| Halifax                                                              | Not included             | 0.81 (0.47, 1.40)         | Not included              |
| Hamilton                                                             | Not included             | 1.00 (0.61, 1.62)         | Not included              |
| Kingston                                                             | Not included             | 0.66 (0.37, 1.16)         | Not included              |
| Quebec                                                               | Not included             | 1.12 (0.66, 1.90)         | Not included              |
| Saskatoon                                                            | Not included             | <b>0.49 (0.26, 0.92)</b>  | Not included              |
| St. John's                                                           | Not included             | 1.32 (0.78, 2.24)         | Not included              |
| Toronto                                                              | Not included             | 0.67 (0.36, 1.25)         | Not included              |
| Number of diseases                                                   |                          |                           |                           |
| 0                                                                    | 1                        | 1                         | 1                         |
| 1                                                                    | 0.92 (0.70, 1.20)        | 0.89 (0.59, 1.33)         | 0.86 (0.60, 1.23)         |
| 2                                                                    | 1.13 (0.86, 1.48)        | 1.45 (0.97, 2.17)         | 0.86 (0.60, 1.24)         |
| 3                                                                    | 1.23 (0.91, 1.66)        | <b>1.59 (1.00, 2.54)</b>  | 0.96 (0.64, 1.43)         |
| 4+                                                                   | <b>1.73 (1.25, 2.38)</b> | <b>1.87 (1.11, 3.17)</b>  | 1.45 (0.97, 2.18)         |
| Medications                                                          |                          |                           |                           |
| Bisphosphonate use                                                   | Not included             | <b>12.4 (1.57, 98.49)</b> | Not included              |

continued

|                                                   |                          |                          |                          |
|---------------------------------------------------|--------------------------|--------------------------|--------------------------|
| Number of surgeries                               |                          |                          |                          |
| 0                                                 | 1                        | 1                        | 1                        |
| 1                                                 | 0.82 (0.67, 1.01)        | Not included             | Not included             |
| 2+                                                | 1.27 (0.91, 1.76)        | Not included             | Not included             |
| Health-related habits                             |                          |                          |                          |
| Caffeine intake 100mg/day                         | <b>0.96 (0.92, 0.99)</b> | Not included             | Not included             |
| Vitamin D intake 100IU/d                          | Not included             | <b>1.03 (1.00, 1.06)</b> | Not included             |
| Current smokers (Yes)                             | <b>2.30 (1.85, 2.86)</b> | <b>1.76 (1.25, 2.47)</b> | <b>2.71 (2.07, 3.55)</b> |
| Regular activity (No)                             | <b>1.33 (1.11, 1.58)</b> | <b>1.49 (1.13, 1.96)</b> | <b>1.32 (1.05, 1.66)</b> |
| Quality-of-life measures                          |                          |                          |                          |
| Standardized Physical component SF-36 (10 points) | <b>0.73 (0.67, 0.80)</b> | <b>0.71 (0.62, 0.81)</b> | <b>0.71 (0.64, 0.79)</b> |

† NA = not applicable due to the lack of fractures during this time period. Values that are bolded represent statistically significant results. To determine this best predictive models all potential variables were included in the multivariable Cox proportional hazard analysis (variables included: hormone replacement therapy (not taking, taking), corticosteroid use (not taking, taking), bisphosphonate use (not taking, taking), age (years), sex (men, women), Canadian Multicentre Osteoporosis Study centre (St. John's, Halifax, Quebec City, Kingston, Toronto, Hamilton, Saskatoon, Calgary, Vancouver), height (analyzed for every 10 cm change), weight (kg), and educational status (no university, some university), clinically recognized minimal trauma fractures at or after age 50 years (no, yes), and radiographic identified vertebral fractures (no, yes), number of diseases (0, 1, 2, 3, or 4+), number of surgeries (0, 1, 2+), caffeine intake (analyzed for every 100 mg/day change in consumption), calcium intake (analyzed for every 100 mg/day change in consumption), vitamin D intake (analyzed for every 100 IU/day change in consumption), alcohol intake (analyzed for every 10 drinks/year change in consumption), regular activity (no/yes), and current smoking status (no/yes); Medical Outcomes Trust 36-item Health Survey standardized physical component summary score (analyzed for every 10 point change in the score) and the Medical Outcomes Trust 36-item Health Survey standardized mental component summary score (analyzed for every 10 point change in the score)). The sex and sex by age interaction was included in the combined analysis. The best predictive models were chosen using the forward selection procedure.
